# Supplementary material for: Phosphorylated cellulose nanofiber membranes with high proton conductivity for polymer electrolyte membranes
Source: Royal Society of Chemistry journal article supplement (doi:10.1039/d4gc05347h), 2025-01-01
Supplement: d4gc05347h1.pdf [file d4gc05347h1.pdf]

**Supplementary Information**

**Phosphorylated Cellulose Nanofiber Membranes with High Proton Conductivity for Polymer Electrolyte Membranes**

Yoshimasa Matsuo <sup>a</sup>, Taisei Kimura <sup>a</sup>, Hinako Koyanagi <sup>a</sup>, Natsuki Netsu <sup>a</sup>, Fuwa Komatsu <sup>a</sup>, Takashi Nagata <sup>b</sup>, Shotaro Nishitsuji <sup>c</sup>, Jun Matsui <sup>d</sup> and Akito Masuhara\* <sup>a, c</sup>

*a Graduate School of Science and Engineering, Yamagata University, 4-3-16 Jonan Yonezawa, Yamagata 992-8510, Japan*

*b Faculty of Engineering, Yamagata University, 4-3-16 Jonan Yonezawa, Yamagata 992-8510, Japan*

*c Graduate School of Organic Materials Science, Yamagata University, 4-3-16 Jonan, Yonezawa, Yamagata 992-8510, Japan*

*d Faculty of Science, Yamagata University, 1-4-12 Kojirakawa-machi, Yamagata 990-8560, Japan*

*e Frontier Center for Organic Materials, Yamagata University, 4-3-16 Jonan Yonezawa, Yamagata 992-8510, Japan*

---

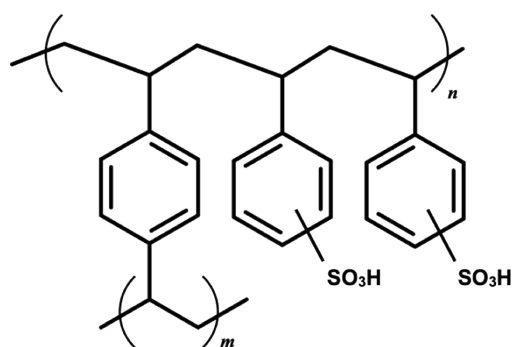

**Figure S1.** Chemical structure of DIAION™

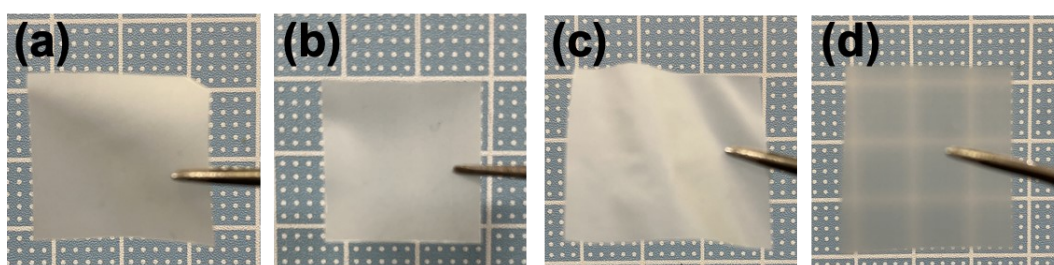

**Figure S2.** The images of (a) CNF, (b) P-CNF-1 h, (c) P-CNF-1.5 h and (d) P-CNF-2 h membrane.

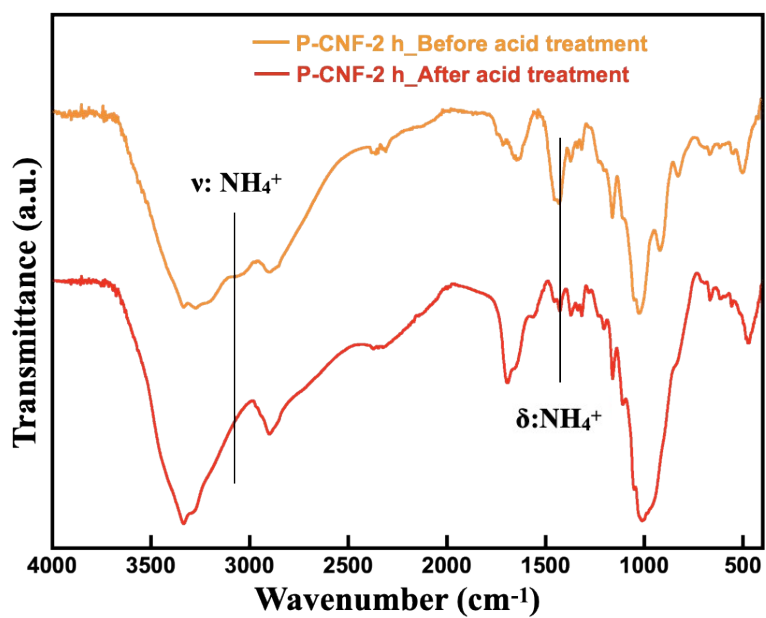

**Figure S3.** FTIR spectra of P-CNF-2 h membranes before acid treatment (orange line) and after acid treatment (red line).

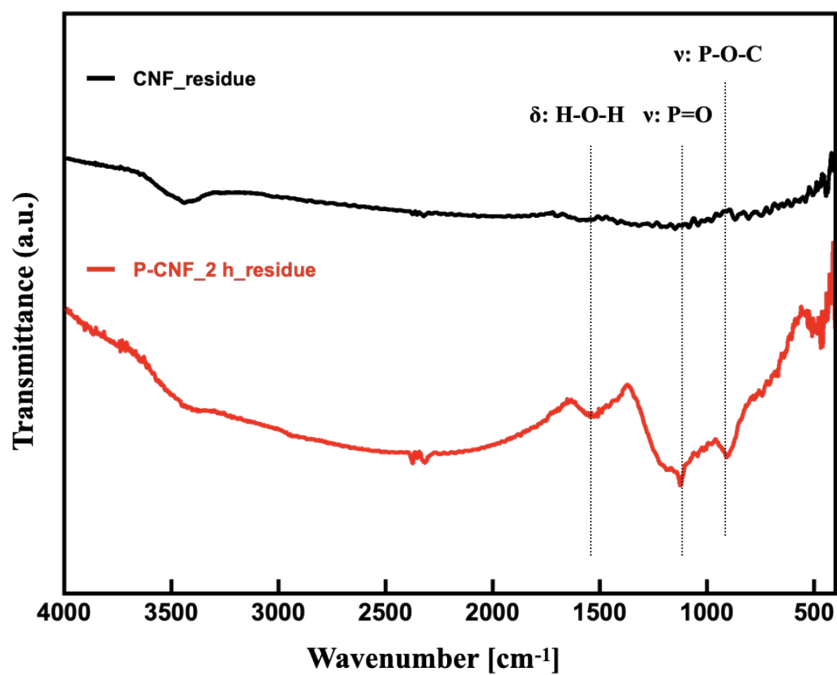

Figure S4. FT-IR (KBr method) spectra of CNF and P-CNF-2h residues after TGA measurement at 600°C under N<sub>2</sub> atmosphere.

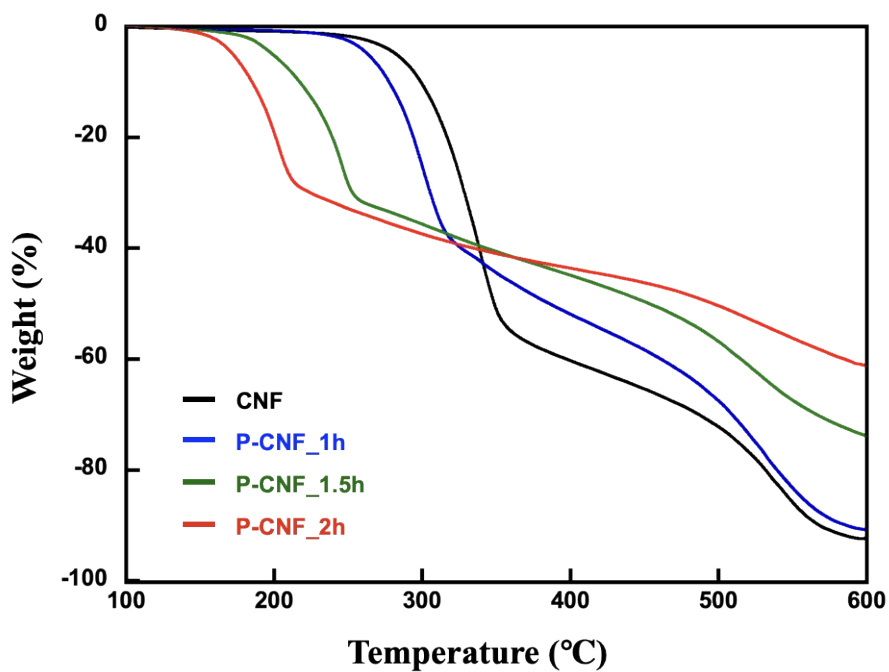

Figure S5. TGA curve measured under an air atmosphere of CNF and each P-CNF.

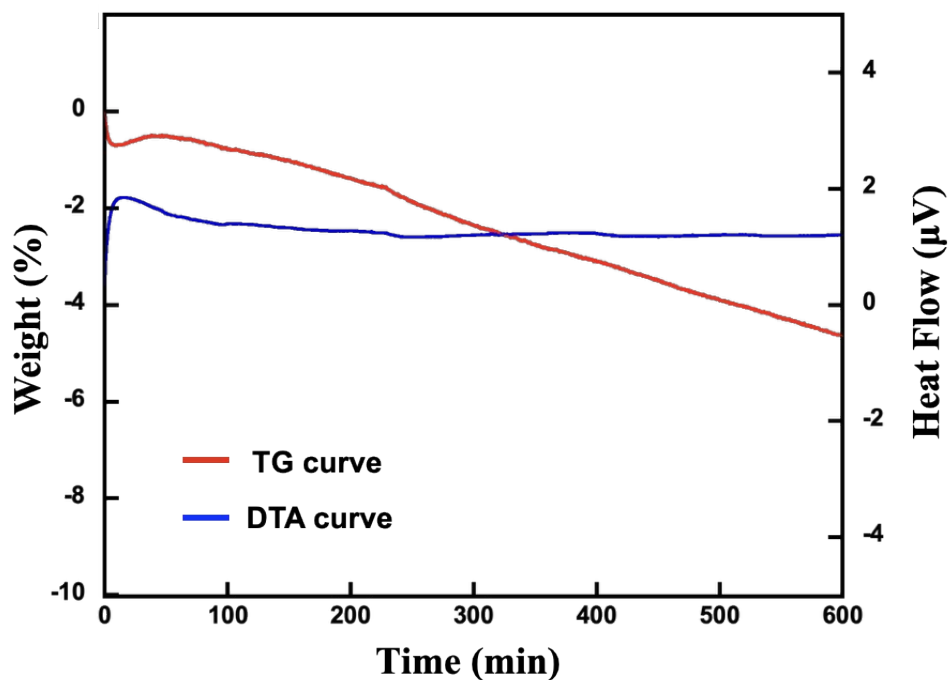

Figure S6. Isothermal TGA/DTA curve measured under a  $N_2$  atmosphere of P-CNF-2h.

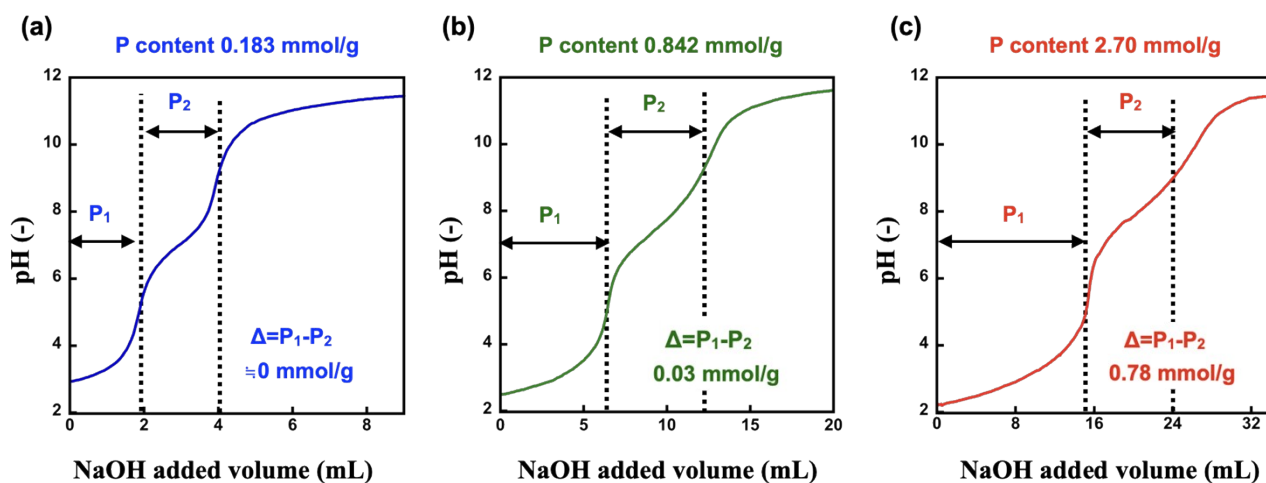

Figure S7. Titration curve of (a) P-CNF-1 h, (b) P-CNF-1.5 h, and (c) P-CNF-2 h.  $P_1$  and  $P_2$  are the volume of NaOH solution for the neutralization of the strong and weak acid of phosphorous groups, respectively.

• Small  $\Delta$

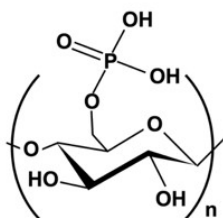

P<sub>1</sub>: Strong acid × 1  
P<sub>2</sub>: Weak acid × 1

• Large  $\Delta$

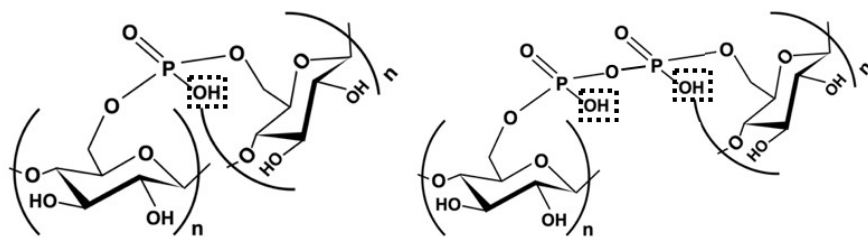

P<sub>1</sub>: Strong acid × 1 or 2

Figure S8. The structure of phosphorylated cellulose predictable from  $\Delta$ .

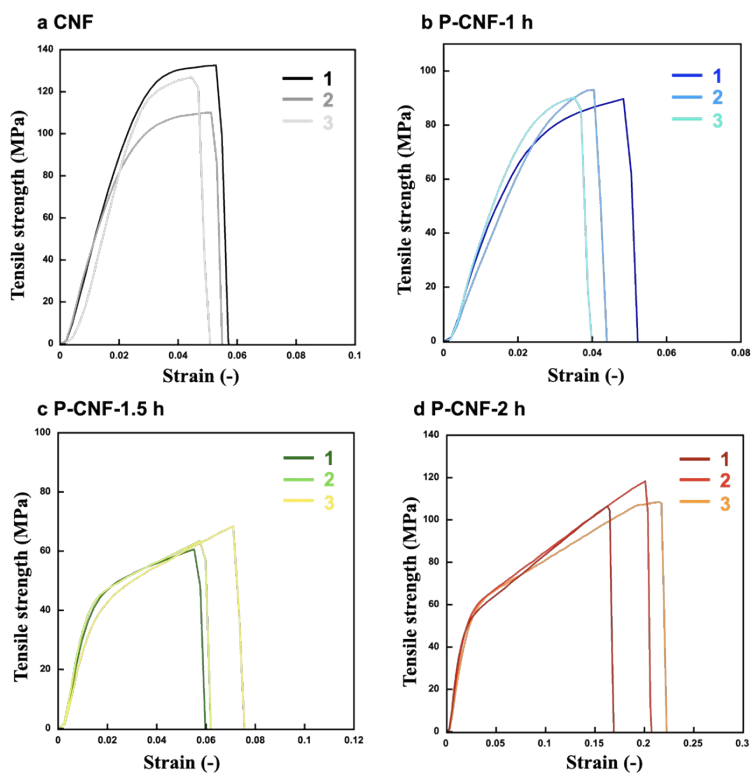

Figure S9. Stress-strain curves of the (a) CNF, (b) P-CNF-1 h, (c) P-CNF-1.5 h, and P-CNF-2 h membranes by 3 times tensile test.

**Table S1.** Summary of average tensile strength and strain at break of the CNF and P-CNF membranes.

| membranes   | Stress at break (MPa) | Strain at break (-)     |
|-------------|-----------------------|-------------------------|
| CNF         | 123.1 ( $\pm 8.0$ )   | 0.0495 ( $\pm 0.0067$ ) |
| P-CNF-1 h   | 91.0 ( $\pm 1.5$ )    | 0.0413 ( $\pm 0.0054$ ) |
| P-CNF-1.5 h | 64.2 ( $\pm 3.2$ )    | 0.0612 ( $\pm 0.0070$ ) |
| P-CNF-2 h   | 111.1 ( $\pm 5.2$ )   | 0.193 ( $\pm 0.022$ )   |

### Oxygen permeability test

Oxygen permeability tests of the Nafion and P-CNF-2 h membrane were measured on GTR-10XASS gas barrier testing system (GTR Tec corp., Japan). To measure the gas permeability, the test gas pressure was set at 101.3 kPa. The temperature for the measurement was 40 °C without humidity control. The volume of the permeated gas was measured via gas chromatography (TCD, G2700, Yanaco, Japan). The gas permeability was measured using the following equation, ( $O_2$  permeability) ( $cm^3/(m^2 \cdot 24h \cdot atm)$ ) =  $q \times k' / (a \times t \times \Delta P)$ , where  $q$  is the permeated volume of gas,  $k'$  is the correction coefficient,  $a$  is the area of the sample ( $15.2 \text{ cm}^2$ ),  $t$  is the measurement time and  $\Delta P$  is the pressure difference (1 atm=101.3 kPa).

**Table S2.** Oxygen permeability measurement at 40°C without humidity control under atmosphere.

| Membranes          | Oxygen permeability ( $cm^3/(m^2 \cdot 24h \cdot atm)$ ) |
|--------------------|----------------------------------------------------------|
| Nafion 212         | $3.00 \times 10^3$                                       |
| P-CNF-2 h membrane | 2.19                                                     |

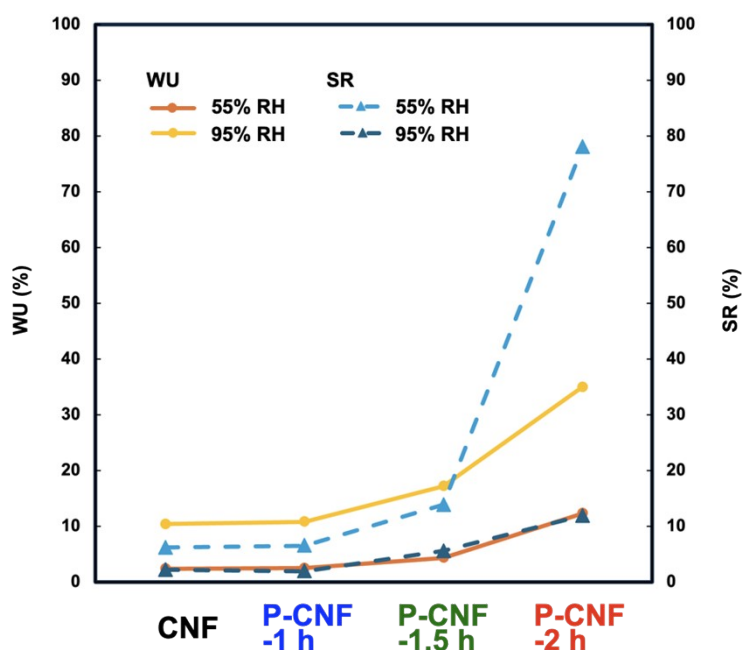

**Figure S10.** Water uptake and swelling ratio of CNF membranes at 80°C under 55% RH and 95% RH.

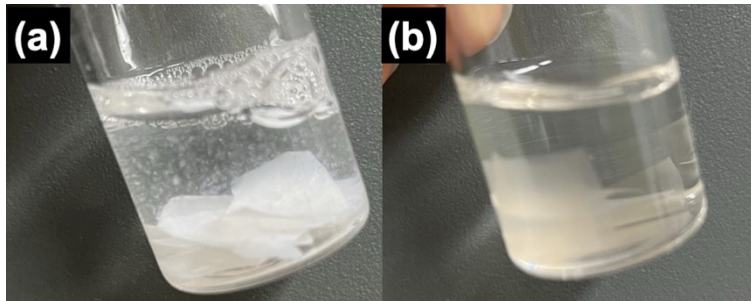

**Figure S11.** Images after ultrasonic treatment of the (a)CNF and (b)P-CNF-2h membranes in water.

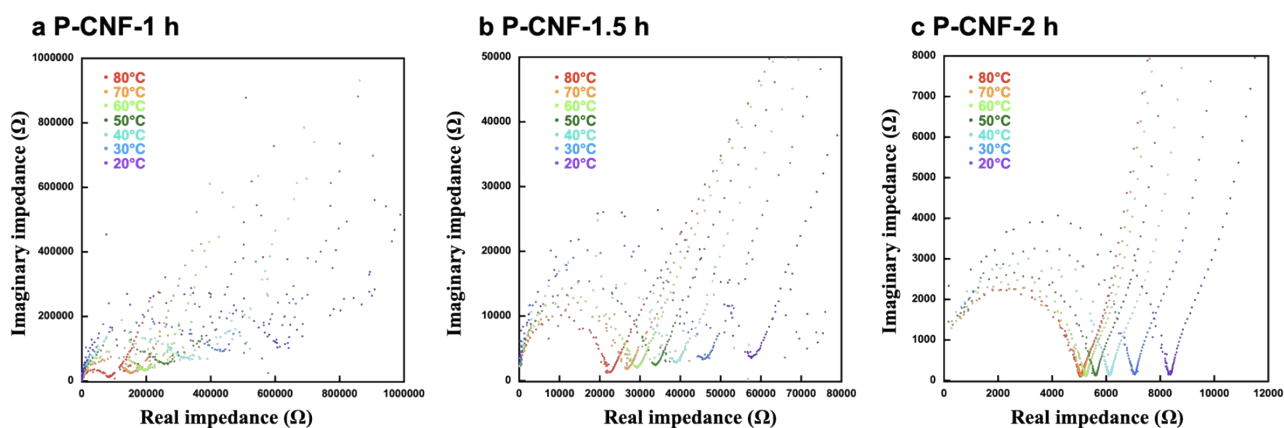

**Figure S12.** Cole-Cole plots of (a) P-CNF-1 h, (b) P-CNF-1.5 h, and (c) P-CNF-2 h membranes at 95% RH.

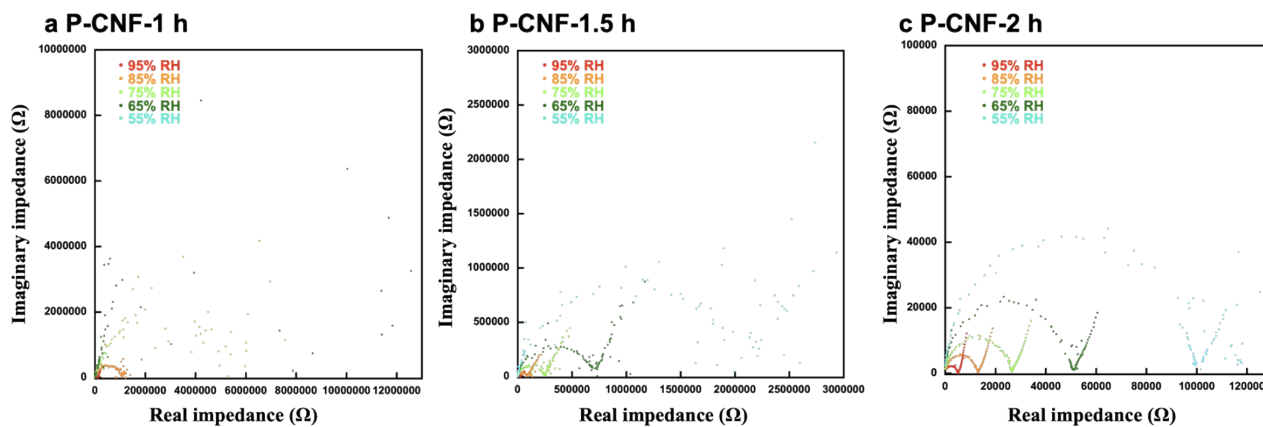

**Figure S13.** Cole-Cole plots of (a) P-CNF-1 h, (b) P-CNF-1.5 h, and (c) P-CNF-2 h membranes at 80°C.

**Table S3.** Summary of the proton conductivities of Nafion 212, CNF, and each P-CNF membrane at different temperatures at 95% RH.

| Sample      | Proton conductivity under 95% RH (S/cm) |                      |                      |                      |                      |                      |                      |
|-------------|-----------------------------------------|----------------------|----------------------|----------------------|----------------------|----------------------|----------------------|
|             | 80°C                                    | 70°C                 | 60°C                 | 50°C                 | 40°C                 | 30°C                 | 20°C                 |
| Nafion 212  | $2.1 \times 10^{-1}$                    | $1.8 \times 10^{-1}$ | $1.6 \times 10^{-1}$ | $1.3 \times 10^{-1}$ | $1.1 \times 10^{-1}$ | $8.6 \times 10^{-2}$ | $6.6 \times 10^{-2}$ |
| CNF         | $3.9 \times 10^{-5}$                    | $3.0 \times 10^{-5}$ | $2.1 \times 10^{-5}$ | $2.0 \times 10^{-5}$ | $1.0 \times 10^{-5}$ | $5.1 \times 10^{-6}$ | $1.9 \times 10^{-6}$ |
| P-CNF-1 h   | $2.6 \times 10^{-3}$                    | $1.4 \times 10^{-3}$ | $1.1 \times 10^{-3}$ | $8.3 \times 10^{-4}$ | $6.8 \times 10^{-4}$ | $5.1 \times 10^{-4}$ | $3.5 \times 10^{-4}$ |
| P-CNF-1.5 h | $1.4 \times 10^{-2}$                    | $1.1 \times 10^{-2}$ | $1.0 \times 10^{-2}$ | $8.7 \times 10^{-3}$ | $7.7 \times 10^{-3}$ | $6.5 \times 10^{-3}$ | $5.1 \times 10^{-3}$ |
| P-CNF-2 h   | $1.2 \times 10^{-1}$                    | $1.2 \times 10^{-1}$ | $1.1 \times 10^{-1}$ | $1.1 \times 10^{-1}$ | $9.7 \times 10^{-2}$ | $8.4 \times 10^{-2}$ | $7.1 \times 10^{-2}$ |

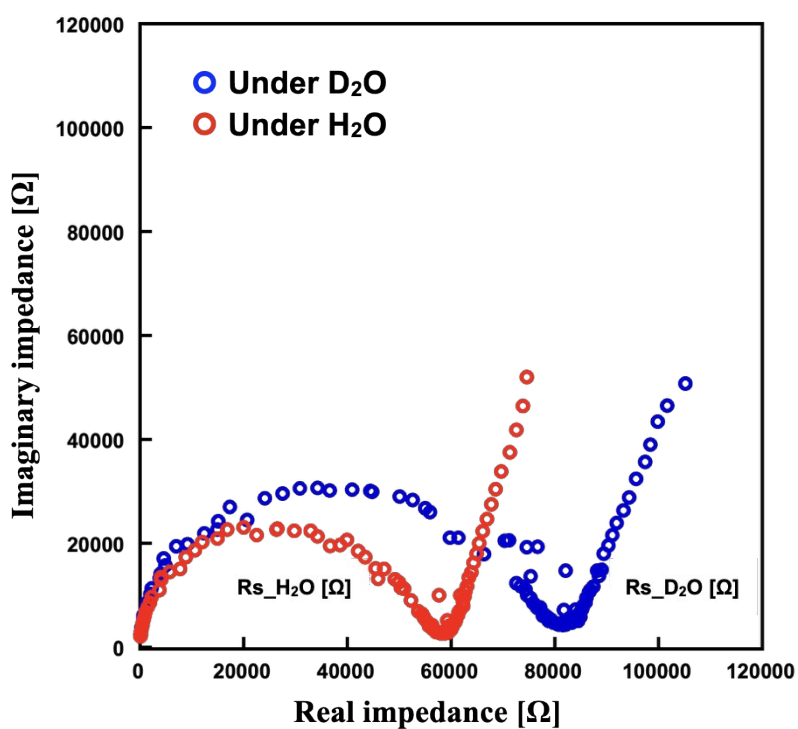

**Figure S14.** Cole-Cole plots of P-CNF-2 h membrane measured at 60°C under H<sub>2</sub>O (red circle) or D<sub>2</sub>O (blue circle) (80–85% RH) atmospheres.



**Table S4.** Summary of proton conductivities of Nafion 212, CNF, and each P-CNF membrane at different relative humidities (RHs) at 80°C.

| Sample      | Proton conductivity at 80°C (S/cm) |                      |                      |                      |                      |
|-------------|------------------------------------|----------------------|----------------------|----------------------|----------------------|
|             | 95% RH                             | 85% RH               | 75% RH               | 65% RH               | 55% RH               |
| Nafion 212  | $2.1 \times 10^{-1}$               | $1.4 \times 10^{-1}$ | $1.0 \times 10^{-1}$ | $7.3 \times 10^{-2}$ | $5.1 \times 10^{-2}$ |
| CNF         | $3.9 \times 10^{-5}$               | $1.2 \times 10^{-5}$ | $3.0 \times 10^{-6}$ | $7.6 \times 10^{-7}$ | $2.1 \times 10^{-7}$ |
| P-CNF-1 h   | $2.6 \times 10^{-3}$               | $2.8 \times 10^{-4}$ | $5.6 \times 10^{-5}$ | $2.3 \times 10^{-5}$ | -                    |
| P-CNF-1.5 h | $1.4 \times 10^{-2}$               | $3.6 \times 10^{-3}$ | $1.2 \times 10^{-3}$ | $4.2 \times 10^{-4}$ | $1.4 \times 10^{-4}$ |
| P-CNF-2 h   | $1.2 \times 10^{-1}$               | $4.6 \times 10^{-2}$ | $2.2 \times 10^{-2}$ | $1.2 \times 10^{-2}$ | $6.0 \times 10^{-3}$ |

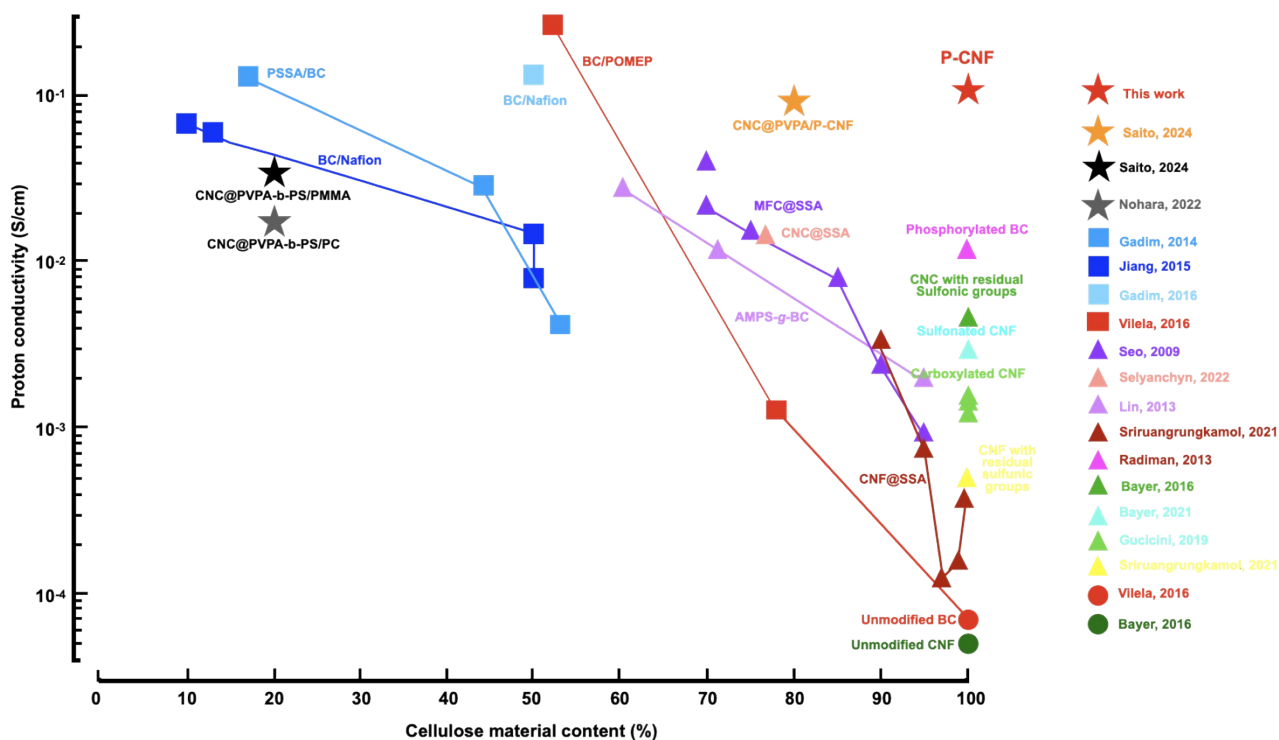

**Figure S15.** A summary of the proton conductivity in different cellulose composite PEMs, as reported in the literature, depicts the proton conductivity according to the cellulose content in the membranes. The data points marked with stars represent the cellulose composite membranes that we have reported, including this paper. Pure cellulose was represented by circular data points, polymer blends by square data points, and modified cellulose by triangular data points.

**Table S5.** Comparison of cellulose based PEMs and their performance. (corresponding to Figure 4.)

| Membranes                         | Temp. (°C) | Hmd. (% RH) | Proton conductivity (S/cm) | Ref.      |
|-----------------------------------|------------|-------------|----------------------------|-----------|
| P-CNF (-2 h)                      | 80         | 95          | $1.2 \times 10^{-1}$       | This work |
| CNC@PVPA/P-CNF                    | 80         | 95          | $9.2 \times 10^{-2}$       | (1)       |
| CNC@PVPA-b-PS /PMMA               | 80         | 95          | $3.1 \times 10^{-2}$       | (2)       |
| CNC@PVPA-b-PS /PC                 | 60         | 95          | $1.8 \times 10^{-2}$       | (3)       |
| PSSA/BC                           | 94         | 98          | $1.3 \times 10^{-1}$       | (4)       |
| BC/Nafion                         | 30         | 100         | $7.1 \times 10^{-2}$       | (5)       |
| BC/Nafion                         | 94         | 98          | $1.4 \times 10^{-1}$       | (6)       |
| BC/POMEPE                         | 80         | 98          | $5.5 \times 10^{-1}$       | (7)       |
| MFC@SSA                           | 25         | In water    | $4.0 \times 10^{-2}$       | (8)       |
| CNC@SSA                           | 120        | 96          | $1.5 \times 10^{-2}$       | (9)       |
| AMPS-g-BC                         | R.T.       | In water    | $2.9 \times 10^{-2}$       | (10)      |
| CNF@SSA                           | R.T.       | In water    | $3.2 \times 10^{-2}$       | (11)      |
| Phosphorylated BC                 | 80         | 100         | $1.1 \times 10^{-2}$       | (12)      |
| CNC with residual sulfonic groups | 120        | 100         | $4.6 \times 10^{-3}$       | (13)      |
| Sulfonated CNF                    | 120        | 100         | $3.0 \times 10^{-3}$       | (14)      |
| Carboxylated CNF                  | 30         | 95          | $1.7 \times 10^{-3}$       | (15)      |
| CNF with residual sulfonic groups | R.T.       | In water    | $5.0 \times 10^{-3}$       | (11)      |
| Unmodified BC                     | 80         | 98          | $6.0 \times 10^{-5}$       | (7)       |
| Unmodified CNF                    | 100        | 100         | $5.0 \times 10^{-3}$       | (13)      |

**Table S6.** Target values and/or guidelines for the properties required of PEMs, along with a comparison of the performance of Nafion 212, 115, 117, and P-CNF-2h membrane.

| Required properties for PEMs | Target values and/or guide line                                                                                                      | Nafion 212 <sup>a</sup>                                                                                        | Nafion 115                                  | Nafion 117                                  | P-CNF-2h <sup>a</sup>                                                                              |
|------------------------------|--------------------------------------------------------------------------------------------------------------------------------------|----------------------------------------------------------------------------------------------------------------|---------------------------------------------|---------------------------------------------|----------------------------------------------------------------------------------------------------|
| Proton conductivity          | $1.2 \times 10^{-1}$ S/cm (80°C, 80% RH) <b>(16)</b>                                                                                 | $2.1 \times 10^{-1}$ S/cm (80°C, 95% RH)<br>$6.6 \times 10^{-2}$ S/cm (20°C, 95% RH)                           | $5.3 - 7.0 \times 10^{-2}$ S/cm <b>(17)</b> | $7.0 - 9.0 \times 10^{-2}$ S/cm <b>(17)</b> | $1.2 \times 10^{-1}$ S/cm (80°C, 95% RH)<br>$7.1 \times 10^{-2}$ S/cm (20°C, 95% RH)               |
| IEC                          | The amount of protons that can be retained and adsorbed by the acidic groups of the PEM through ion-exchange reactions.              | 0.95 meq/g                                                                                                     | 0.91 meq/g <b>(18)</b>                      | 0.90 meq/g <b>(19)</b>                      | 3.40 meq/g                                                                                         |
| Water uptake                 | Absorption rate of water molecules for proton conduction.                                                                            | 14.6 % (80°C, 95% RH)                                                                                          | -                                           | -                                           | 35.0 % (80°C, 95% RH)                                                                              |
| Swelling ratio               | Dimensional stability with humidification-drying cycles during operating PEFCs.                                                      | 16.0 % (80°C, 95% RH)                                                                                          | -                                           | -                                           | 78.0 % (80°C, 95% RH)                                                                              |
| Environmental impact         | PFAS-free : Regulation of PFAS                                                                                                       | Fluoropolymers                                                                                                 | Fluoropolymers                              | Fluoropolymers                              | Natural resource, PFAS-free                                                                        |
| pKa                          | Weakly acidic membrane eliminates the need for acid-resistant peripheral components.                                                 | -6.0                                                                                                           | -6.0                                        | -6.0                                        | pKa <sub>1</sub> ≈ 2.2, pKa <sub>2</sub> ≈ 7.0                                                     |
| Tensile test                 | Prevents PEM damage from mechanical stress applied during cell assembly.                                                             | 26.1 MPa (Ambient condition)                                                                                   | 27.46 MPa <b>(20)</b> (23 °C)               | 25 MPa <b>(21)</b> (Ambient condition)      | 111.1 MPa (Ambient condition)                                                                      |
| Gas (Oxygen) permeability    | The low oxygen permeability is important because oxygen permeation through the PEM causes membrane degradation by radical formation. | $3.00 \times 10^3$ cm <sup>3</sup> /(m <sup>2</sup> · 24h · atm) <sup>c</sup> (40°C, without humidity control) | -                                           | -                                           | $2.19$ cm <sup>3</sup> /(m <sup>2</sup> · 24h · atm) <sup>c</sup> (40°C, without humidity control) |
| Thickness                    | < 8 μm <b>(16)</b>                                                                                                                   | 50 μm                                                                                                          | 125 μm <b>(22)</b>                          | 175 μm <b>(22)</b>                          | 30-45 μm                                                                                           |
| Cost                         | 17.5 \$/m <sup>2</sup> (2025 target) <b>(23)</b>                                                                                     | 2200 \$/m <sup>2</sup> <b>(17)</b>                                                                             | 2700 \$/m <sup>2</sup> <b>(17)</b>          | 3200 \$/m <sup>2</sup> <b>(17)</b>          | 312 \$/m <sup>2</sup> <sup>b</sup>                                                                 |

<sup>a</sup> Obtained results from this study and our previous study.

<sup>b</sup> Estimated cost of materials used to synthesize P-CNF.

## References

- (1) T. Saito, Y. Matsuo, K. Tabata, T. Makino, T. Nohara and A. Masuhara, *Energy Fuels*, 2024, **38**, 4645-4652.
- (2) T. Nohara, T. Arita, K. Tabata, T. Saito, R. Shimada, H. Nakazaki, Y. Suzuki, R. Sato and A. Masuhara, *ACS Appl. Mater. Interfaces*, 2022, **14**, 8353-8360.
- (3) T. Saito, T. Nohara, K. Tabata, H. Nakazaki, T. Makino, Y. Matsuo, K. Sato, C. Abadie and A. Masuhara, *Energy Fuels*, 2022, **36**, 13924-13929.
- (4) T. D. O. Gadim, A. G. P. R. Figueiredo, N. C. Rosero-Navarro, C. Vilela, J. A. F. Gamelas, A. Barros-Timmons, C. P. Neto, A. J. D. Silvestre, C. S. R. Freire and F. M. L. Figueiredo, *ACS Appl. Mater. Interfaces*, 2014, **6**, 7864-7875.
- (5) G.-p. Jiang, J. Zhang, J.-l. Qiao, Y.-m. Jiang, H. Zarrin, Z. Chen and F. Hong, *J. Power Sources*, 2015, **273**, 697-706.
- (6) T. D. O. Gadim, C. Vilela, F. J. A. Loureiro, A. J. D. Silvestre, C. S. R. Freire and F. M. L. Figueiredo, *Ind. Crops Prod.*, 2016, **93**, 212-218.
- (7) C. Vilela, T. D. O. Gadim, A. J. D. Silvestre, C. S. R. Freire and F. M. L. Figueiredo, *Cellulose (Dordrecht, Neth.)*, 2016, **23**, 3677-3689.
- (8) J. A. Seo, J. C. Kim, J. K. Koh, S. H. Ahn and J. H. Kim, *Ionics*, 2009, **15**, 555-560.
- (9) O. Selyanchyn, T. Bayer, D. Klotz, R. Selyanchyn, K. Sasaki and S. M. Lyth, *Membranes (Basel, Switz.)*, 2022, **12**, 658.
- (10) C. W. Lin, S. S. Liang, S. W. Chen and J. T. Lai, *J. Power Sources*, 2013, **232**, 297-305.

- (11) A. Sriruangrunkamol and W. Chonkaew, *Polym. Bull. (Heidelberg, Ger.)*, 2021, **78**, 3705-3728.
- (12) C. L. Radiman and A. Rifathin, *J. Appl. Polym. Sci.*, 2013, **130**, 399-405.
- (13) T. Bayer, B. V. Cuning, R. Selyanchyn, M. Nishihara, S. Fujikawa, K. Sasaki and S. M. Lyth, *Chem. Mater.*, 2016, **28**, 4805-4814.
- (14) T. Bayer, B. V. Cuning, B. Smid, R. Selyanchyn, S. Fujikawa, K. Sasaki and S. M. Lyth, *Cellulose. (Dordrecht, Neth.)*, 2021, **28**, 1355-1367.
- (15) V. Guccini, A. Carlson, S. Yu, G. Lindbergh, R. W. Lindstroem and G. Salazar-Alvarez, *J. Mater. Chem. A*, 2019, **7**, 25032-25039.
- (16) Japan Government, NEDO hydrogen roadmap (in Japanese), 2023, [https://www.nedo.go.jp/library/battery\\_hydrogen.html](https://www.nedo.go.jp/library/battery_hydrogen.html)
- (17) M. R. Asghar and Q. Xu, *Journal of Polymer Research*, 2024, **31**, 125.
- (18) P. Costamagna, C. Yang, A. B. Bocarsly and S. Srinivasan, *Electrochimica acta*, 2002, **47**, 1023-1033.
- (19) B. Ghanti, R. Kamble, H. Komber, B. Voit and S. Banerjee, *Journal of Power Sources*, 2025, **631**, 236201.
- (20) C. Ceballos-Alvarez, M. Jafari, M. Siaj, S. Shahgaldi and R. Izquierdo, *Nanomaterials*, 2025, **15**, 68.
- (21) M. Gouda, W. Gouveia, N. Elessawy, B. Šljukić, A. A. Nassr and D. Santos, *International Journal of Hydrogen Energy*, 2020, **45**, 15226-15238.
- (22) X. Du, J. Yu, B. Yi, M. Han and K. Bi, *Physical Chemistry Chemical Physics*, 2001, **3**, 3175-3179.
- (23) Fuel cell Technical Team Roadmap, 2017, [www.energy.gov/eere/vehicles/downloads/us-drive-fuel-cell-technical-team-roadmap](http://www.energy.gov/eere/vehicles/downloads/us-drive-fuel-cell-technical-team-roadmap).
-
